# Supplementary material for: Elucidating anticancer drugs release from UiO-66 as a carrier through the computational approaches
Source: Royal Society of Chemistry journal article supplement (doi:10.1039/d3ra05587f), 2023-01-01
Supplement: d3ra05587f1.pdf [file d3ra05587f1.pdf]

## **Supplementary information: Elucidating Anticancer Drug Release from UiO-66 as a Carrier through the Computational Approaches**

*Tahereh Boroushaki<sup>a</sup>, Mokhtar Ganjali Koli<sup>b</sup>, Rahime Eshaghi Malekshah<sup>c</sup>, Mohammad G.  
Dekamin<sup>a,\*</sup>*

*<sup>a</sup>Pharmaceutical and Heterocyclic Compounds Research Laboratory, Department of  
Chemistry, Iran University of Science and Technology, Tehran, 16846-13114, Iran*

*<sup>b</sup>Department of Chemistry, University of Kurdistan, Sanandaj, Iran*

*<sup>c</sup>Department of Chemistry, Faculty of Science, Semnan University, Semnan, Iran*

**\*Corresponding Author:**

Email: [mdekamin@iust.ac.ir](mailto:mdekamin@iust.ac.ir)

## *Contents*

|                                                                                          |          |
|------------------------------------------------------------------------------------------|----------|
| <b>1. Interaction energies .....</b>                                                     | <b>2</b> |
| <b>Figure S1:</b> Interaction energy between drug and UiO-66 in C4-C6 simulated systems. |          |
| <b>2. Density.....</b>                                                                   | <b>3</b> |
| <b>Figure S2:</b> The density of water in different simulated systems.                   |          |
| <b>Figure S3:</b> Visualization of Zr atom positions in UiO-66 structure.                |          |
| <b>Table S1:</b> Drug properties in different simulated systems and reference system.    |          |

## 1. Interaction energies

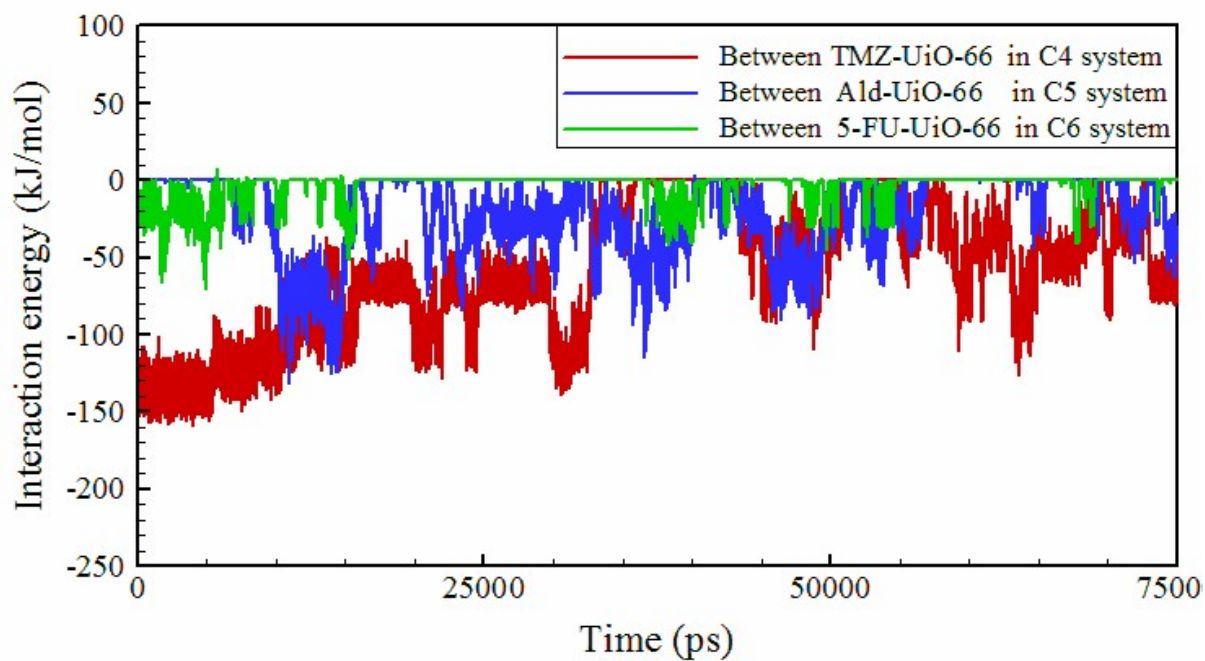

**Figure S1.** The interaction energy between drug and UiO-66 in simulated systems

**The system C4 consists of TMZ + UiO-66 + Water**

**The system C5 consists of Ald + UiO-66 + Water**

**The system C6 consists of 5-FU + UiO-66 + Water**

## 2. Density profile in UiO-66

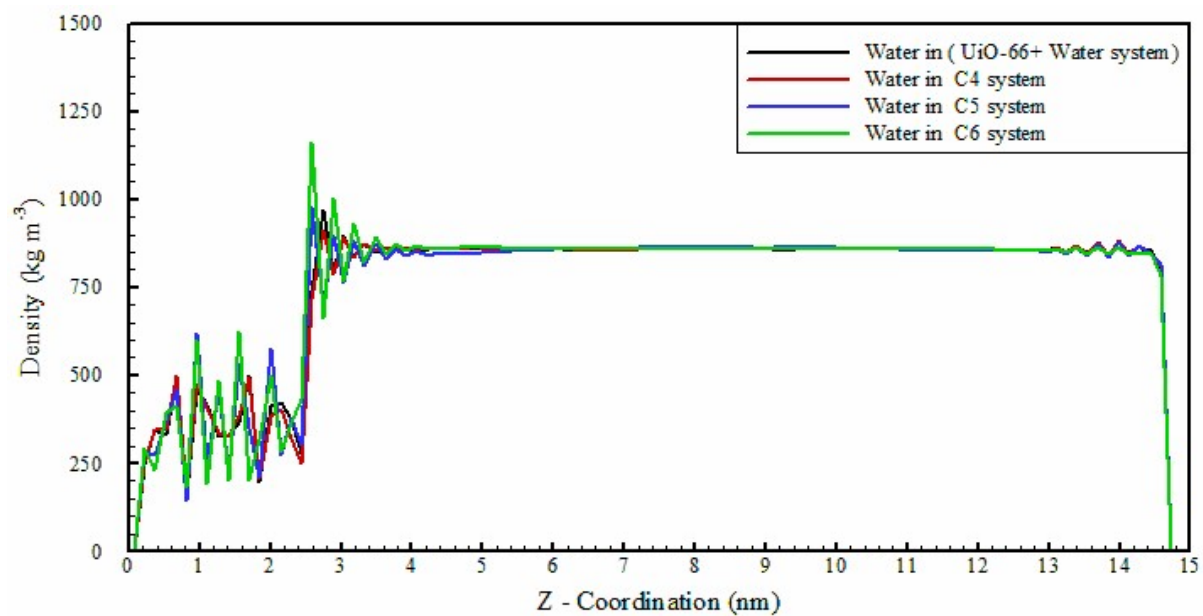

**Figure S2.** The profile of density of water in different simulated systems.

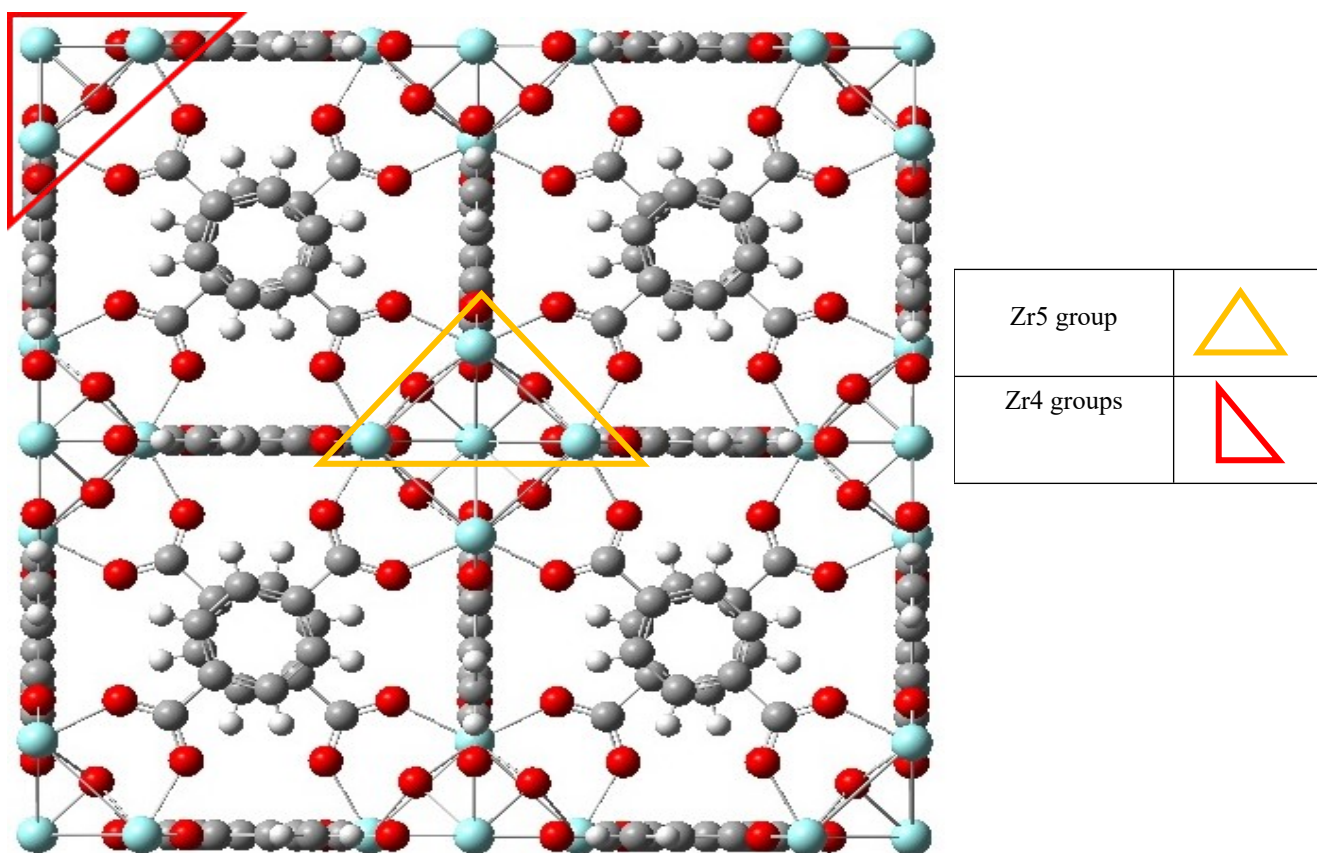

**Figure S3:** Visualization of Zr atom positions in UiO-66 structure.

**Table S1.** Number of contacts in different simulated systems in 300 K and 313 K.

|                | <b>Property Systems</b>  | <b>Number of Contact between Zr5 and water molecules</b> | <b>Number of Contact between Zr6 and water molecules</b> |
|----------------|--------------------------|----------------------------------------------------------|----------------------------------------------------------|
| <b>T=300 K</b> | <b>TMZ/water/UiO-66</b>  | 1.222( $\pm$ 0.005)                                      | 1.179( $\pm$ 0.033)                                      |
|                | <b>Ald/water/UiO-66</b>  | 1.404( $\pm$ 0.006)                                      | 1.406( $\pm$ 0.008)                                      |
|                | <b>5-Fu/water/UiO-66</b> | 0.992( $\pm$ 0.004)                                      | 0.977( $\pm$ 0.005)                                      |
| <b>T=313 K</b> | <b>TMZ/water/UiO-66</b>  | 1.179( $\pm$ 0.898)                                      | 1.128( $\pm$ 0.888)                                      |
|                | <b>Ald/water/UiO-66</b>  | 1.208( $\pm$ 0.917)                                      | 0.278( $\pm$ 0.235)                                      |
|                | <b>5-Fu/water/UiO-66</b> | 0.910( $\pm$ 0.773)                                      | 0.955( $\pm$ 841)                                        |
